# Supplementary material
Source: Springer Nature journal article supplement (https://www.springermedizin.de/resource/supplementary/13075_2013_4370_MOESM3_ESM.pdf/9696072)

IL-1

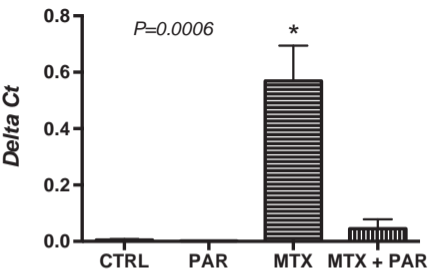

IL-6

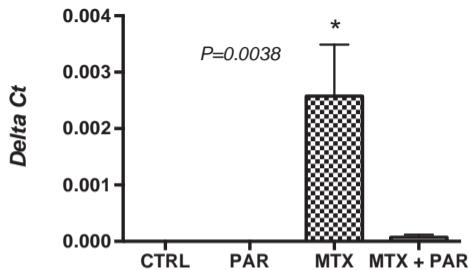

IL-1

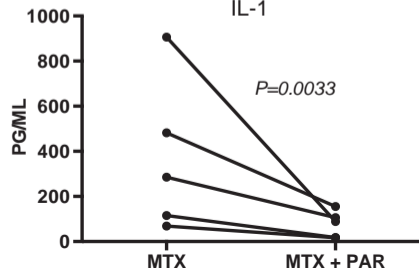

IL-6

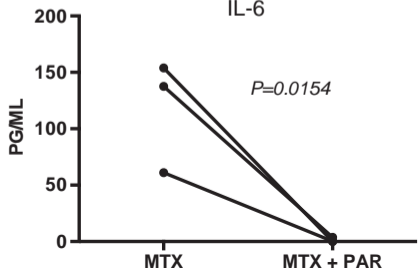

Supplement: MOESM3 [file 9696072]
